# Supplementary material for: Contrasting appinites, vaugnerites and related granitoids from the NW Iberian Massif: insight into mantle and crustal sources
Source: Copernicus journal article supplement (doi:10.5194/ejm-35-845-2023), 2023-10-18

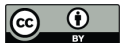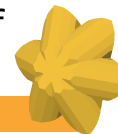

*Supplement of*

## **Contrasting appinites, vaugnerites and related granitoids from the NW Iberian Massif: insight into mantle and crustal sources**

**Gumer Galán et al.**

*Correspondence to:* Gumer Galán ([gumer.galan@uab.cat](mailto:gumer.galan@uab.cat)) and Gloria Gallastegui ([g.gallastegui@igme.es](mailto:g.gallastegui@igme.es))

The copyright of individual parts of the supplement might differ from the article licence.

| Sample               | Rb (ppm) | Sr (ppm) | <sup>87</sup> Rb / <sup>86</sup> Sr | <sup>87</sup> Sr / <sup>86</sup> Sr | ± 2σ    | ( <sup>87</sup> Sr / <sup>86</sup> Sr) <sub>314</sub> | εSr <sub>314</sub> | Sm (ppm)        | Nd (ppm) | <sup>147</sup> Sm / <sup>144</sup> Nd | <sup>143</sup> Nd / <sup>144</sup> Nd | ± 2σ     | ( <sup>143</sup> Nd / <sup>144</sup> Nd) <sub>314</sub> | εNd <sub>314</sub> | T <sub>CR</sub> (Ga) |
|----------------------|----------|----------|-------------------------------------|-------------------------------------|---------|-------------------------------------------------------|--------------------|-----------------|----------|---------------------------------------|---------------------------------------|----------|---------------------------------------------------------|--------------------|----------------------|
| VIVERO               |          |          |                                     |                                     |         |                                                       |                    |                 |          |                                       |                                       |          |                                                         |                    |                      |
| Ultramafic appinites |          |          |                                     |                                     |         |                                                       |                    |                 |          |                                       |                                       |          |                                                         |                    |                      |
| VGI-1                | 13.4     | 53.4     | 0.725                               | 0.70973                             | 0.00005 | 0.7065                                                | 33                 | nd <sup>1</sup> | nd       | nd                                    | nd                                    |          |                                                         |                    |                      |
| VGI-2                | 8.51     | 28.2     | 0.874                               | 0.71005                             | 0.00005 | 0.7061                                                | 29                 | 0.98            | 3.79     | 0.156                                 | 0.512546                              | 0.000019 | 0.512225                                                | -0.2               | 1.47                 |
| VGI-3                | 13.1     | 65       | 0.584                               | 0.70923                             | 0.00005 | 0.7066                                                | 35                 | 1.48            | 4.8      | 0.187                                 | 0.512544                              | 0.000017 | 0.512160                                                | -1.4               | 2.83                 |
| VGI-4                | 12.1     | 66.8     | 0.523                               | 0.70887                             | 0.00005 | 0.7065                                                | 34                 | 1.47            | 4.82     | 0.184                                 | 0.512549                              | 0.000022 | 0.512170                                                | -1.2               | 2.63                 |
| VGI-5                | 31.1     | 68.7     | 1.312                               | 0.71420                             | 0.00005 | 0.7083                                                | 60                 | 3.82            | 14.7     | 0.157                                 | 0.512540                              | 0.000016 | 0.512217                                                | -0.3               | 1.50                 |
| VGI-6                | 36.6     | 107      | 0.994                               | 0.71082                             | 0.00005 | 0.7064                                                | 32                 | 2.39            | 9.92     | 0.146                                 | 0.512429                              | 0.000014 | 0.512129                                                | -2.0               | 1.50                 |
| VGI-7                | 34.8     | 142      | 0.707                               | 0.70953                             | 0.00005 | 0.7064                                                | 32                 | nd              | nd       | nd                                    | nd                                    |          |                                                         |                    |                      |
| VGI-9                | 25.8     | 81.9     | 0.914                               | 0.71026                             | 0.00005 | 0.7062                                                | 29                 | 2.4             | 8.33     | 0.175                                 | 0.512522                              | 0.000017 | 0.512163                                                | -1.4               | 2.15                 |
| VGI-10               | 21.6     | 84.6     | 0.738                               | 0.70966                             | 0.00005 | 0.7064                                                | 32                 | nd              | nd       | nd                                    | nd                                    |          |                                                         |                    |                      |
| VGI-11               | 16.8     | 85.9     | 0.566                               | 0.70919                             | 0.00005 | 0.7067                                                | 36                 | 2.57            | 8.81     | 0.177                                 | 0.512489                              | 0.000018 | 0.512126                                                | -2.1               | 2.37                 |
| Mafic appinites      |          |          |                                     |                                     |         |                                                       |                    |                 |          |                                       |                                       |          |                                                         |                    |                      |
| VGI-12               | 145      | 495      | 0.848                               | 0.71022                             | 0.00002 | 0.7064                                                | 33                 | 12              | 4.87     | 0.137                                 | 0.512411                              | 0.000018 | 0.512129                                                | -2.0               | 1.37                 |
| VGI-13               | 115      | 328      | 1.015                               | 0.71055                             | 0.00002 | 0.7060                                                | 27                 | 13              | 5.56     | 0.140                                 | 0.512516                              | 0.000015 | 0.512228                                                | -0.1               | 1.23                 |
| VGI-14               | 110      | 470      | 0.762                               | 0.71071                             | 0.00002 | 0.7073                                                | 45                 | nd              | nd       | nd                                    | nd                                    |          |                                                         |                    |                      |
| VGI-34               | 68.9     | 342      | 0.583                               | 0.70999                             | 0.00002 | 0.7074                                                | 46                 | 34              | 3.62     | 0.142                                 | 0.512327                              | 0.000017 | 0.512035                                                | -3.9               | 1.63                 |
| VGI-17               | 131      | 348      | 1.089                               | 0.71131                             | 0.00002 | 0.7064                                                | 33                 | nd              | nd       | nd                                    | nd                                    |          |                                                         |                    |                      |
| VGI-21               | 105      | 365      | 0.832                               | 0.71006                             | 0.00002 | 0.7063                                                | 31                 | 7.32            | 32.5     | 0.136                                 | 0.512411                              | 0.0014   | 0.512131                                                | -2.0               | 1.36                 |
| Granitoids           |          |          |                                     |                                     |         |                                                       |                    |                 |          |                                       |                                       |          |                                                         |                    |                      |
| Tonalites            |          |          |                                     |                                     |         |                                                       |                    |                 |          |                                       |                                       |          |                                                         |                    |                      |
| VGI-15               | 98.1     | 443      | 0.641                               | 0.71029                             | 0.00002 | 0.7074                                                | 47                 | 5.47            | 27       | 0.122                                 | 0.512255                              | 0.000018 | 0.512004                                                | -4.5               | 1.41                 |
| VGI-16               | 103      | 421      | 0.708                               | 0.71032                             | 0.00001 | 0.7072                                                | 43                 | nd              | nd       | nd                                    | nd                                    |          |                                                         |                    |                      |
| VGI-18               | 84.9     | 546      | 0.71                                | 0.70984                             | 0.00002 | 0.7067                                                | 36                 | 2.75            | 12.6     | 0.132                                 | 0.512329                              | 0.000012 | 0.512058                                                | -3.4               | 1.44                 |
| VGI-22               | 123      | 349      | 1.021                               | 0.71106                             | 0.00002 | 0.7065                                                | 34                 | 5.78            | 26.9     | 0.130                                 | 0.512391                              | 0.000009 | 0.512124                                                | -2.1               | 1.30                 |
| VGI-25               | 114      | 433      | 0.766                               | 0.71080                             | 0.00002 | 0.7074                                                | 46                 | nd              | nd       | nd                                    | nd                                    |          |                                                         |                    |                      |
| VGI-28               | 131      | 349      | 1.092                               | 0.71187                             | 0.00002 | 0.7070                                                | 41                 | nd              | nd       | nd                                    | nd                                    |          |                                                         |                    |                      |
| Granodiorites        |          |          |                                     |                                     |         |                                                       |                    |                 |          |                                       |                                       |          |                                                         |                    |                      |
| VGI-19               | 122      | 401      | 0.885                               | 0.71215                             | 0.00002 | 0.7082                                                | 58                 | nd              | nd       | nd                                    | nd                                    |          |                                                         |                    |                      |
| VGI-23               | 139      | 364      | 1.116                               | 0.71282                             | 0.00001 | 0.7078                                                | 53                 | 3.36            | 17.1     | 0.118                                 | 0.512242                              | 0.000018 | 0.512000                                                | -4.6               | 1.37                 |
| VGI-24               | 133      | 402      | 0.962                               | 0.71222                             | 0.00001 | 0.7079                                                | 54                 | nd              | nd       | nd                                    | nd                                    |          |                                                         |                    |                      |
| VGI-35               | 122      | 432      | 0.824                               | 0.71183                             | 0.00001 | 0.7081                                                | 57                 | 6.15            | 34.3     | 0.109                                 | 0.512185                              | 0.000012 | 0.511962                                                | -5.3               | 1.33                 |
| Monzonitic granites  |          |          |                                     |                                     |         |                                                       |                    |                 |          |                                       |                                       |          |                                                         |                    |                      |
| VGI-20               | 137      | 379      | 1.046                               | 0.71274                             | 0.00002 | 0.7081                                                | 56                 | 6.85            | 38.7     | 0.107                                 | 0.512136                              | 0.000014 | 0.511916                                                | -6.2               | 1.38                 |
| VGI-29               | 162      | 554      | 0.846                               | 0.71218                             | 0.00001 | 0.7084                                                | 61                 | 7.05            | 40.3     | 0.106                                 | 0.512139                              | 0.000009 | 0.511922                                                | -6.1               | 1.36                 |

<sup>1</sup> Non determined

**Table S1** Rb, Sr, Sm, Nd concentrations and isotopic compositions of the Vivero appinite-granitoid association (Galán et al. 1996) and of Bayo-Vigo vaugnerite-granitoid association (Gallastegui 2005). T<sub>CR</sub> estimates after Goldstein et al. (1984).

| Sample              | Rb (ppm) | Sr (ppm) | <sup>87</sup> Rb / <sup>86</sup> Sr | <sup>87</sup> Sr / <sup>86</sup> Sr | ± 2σ   | ( <sup>87</sup> Sr / <sup>86</sup> Sr) <sub>320</sub> | εSr <sub>320</sub> | Sm (ppm)        | Nd (ppm) | <sup>147</sup> Sm / <sup>144</sup> Nd | <sup>143</sup> Nd / <sup>144</sup> Nd | ± 2σ     | ( <sup>143</sup> Nd / <sup>144</sup> Nd) <sub>320</sub> | εNd <sub>320</sub> | T <sub>CR</sub> (Ga) |
|---------------------|----------|----------|-------------------------------------|-------------------------------------|--------|-------------------------------------------------------|--------------------|-----------------|----------|---------------------------------------|---------------------------------------|----------|---------------------------------------------------------|--------------------|----------------------|
| BAYO-VIGO           |          |          |                                     |                                     |        |                                                       |                    |                 |          |                                       |                                       |          |                                                         |                    |                      |
| Vaugnerites         |          |          |                                     |                                     |        |                                                       |                    |                 |          |                                       |                                       |          |                                                         |                    |                      |
| 243                 | 177      | 476      | 1.073                               | 0.7093                              | 0.0001 | 0.7044                                                | 0.8                | nd <sup>1</sup> | nd       | nd                                    | nd                                    |          |                                                         |                    |                      |
| 290                 | 132      | 1058     | 0.361                               | 0.7110                              | 0.0001 | 0.7093                                                | 71                 | nd              | nd       | nd                                    | nd                                    |          |                                                         |                    |                      |
| 159                 |          |          |                                     |                                     |        |                                                       |                    | 8.76            | 61.59    | 0.0856                                | 0.512209                              | 0.000007 | 0.512030                                                | -3.8               | 1.08                 |
| Granitoids          |          |          |                                     |                                     |        |                                                       |                    |                 |          |                                       |                                       |          |                                                         |                    |                      |
| Granodiorites       |          |          |                                     |                                     |        |                                                       |                    |                 |          |                                       |                                       |          |                                                         |                    |                      |
| 247                 | 254      | 304      | 2.423                               | 0.7190                              | 0.0001 | 0.7080                                                | 52                 | nd              | nd       | nd                                    | nd                                    |          |                                                         |                    |                      |
| 167                 | 278      | 314      | 2.570                               | 0.7196                              | 0.0001 | 0.7079                                                | 51                 | nd              | nd       | nd                                    | nd                                    |          |                                                         |                    |                      |
| 115                 | 323      | 313      | 2.993                               | 0.7218                              | 0.0001 | 0.7082                                                | 54                 | nd              | nd       | nd                                    | nd                                    |          |                                                         |                    |                      |
| Monzonitic granites |          |          |                                     |                                     |        |                                                       |                    |                 |          |                                       |                                       |          |                                                         |                    |                      |
| 6904                | 156      | 301      | 1.500                               | 0.7169                              | 0.0001 | 0.7101                                                | 82                 | nd              | nd       | nd                                    | nd                                    |          |                                                         |                    |                      |

<sup>1</sup>Non determined

**Table S1** Continued

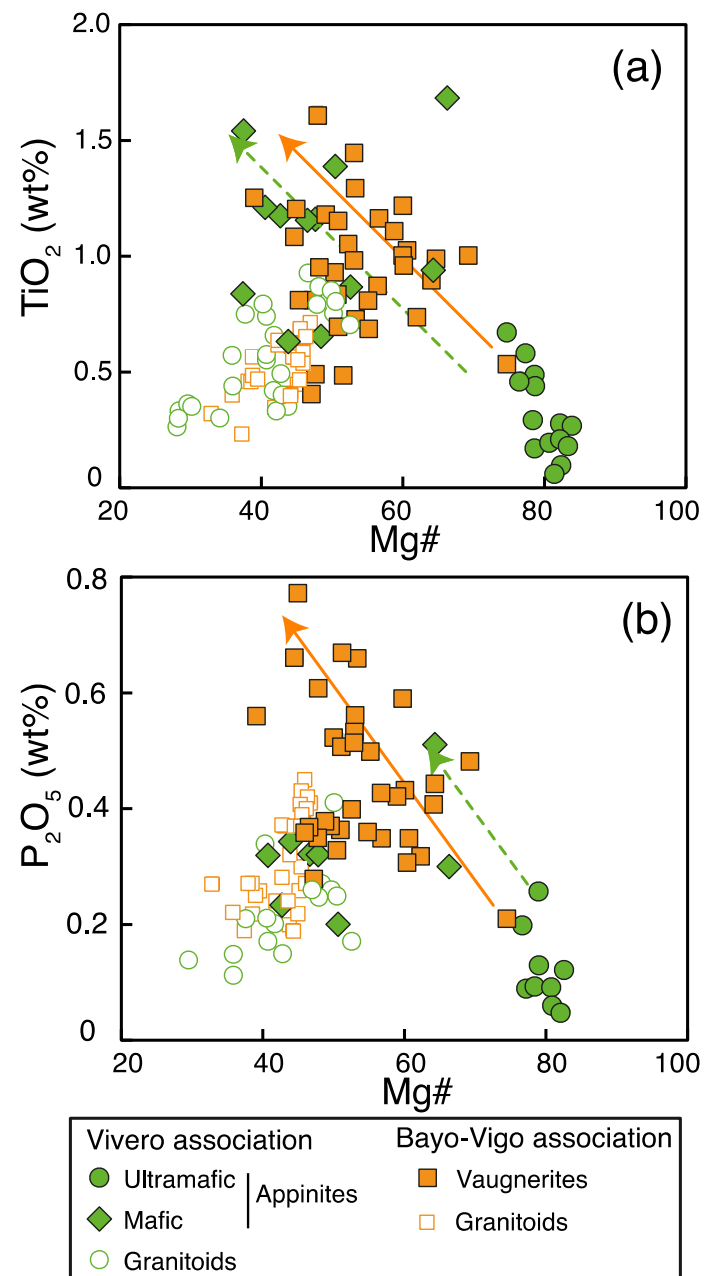

**SI Figure S1** (a)  $TiO_2$  vs. Mg# diagram for the appinitic and vaugneritic associations (b)  $P_2O_5$  vs. Mg# diagram.

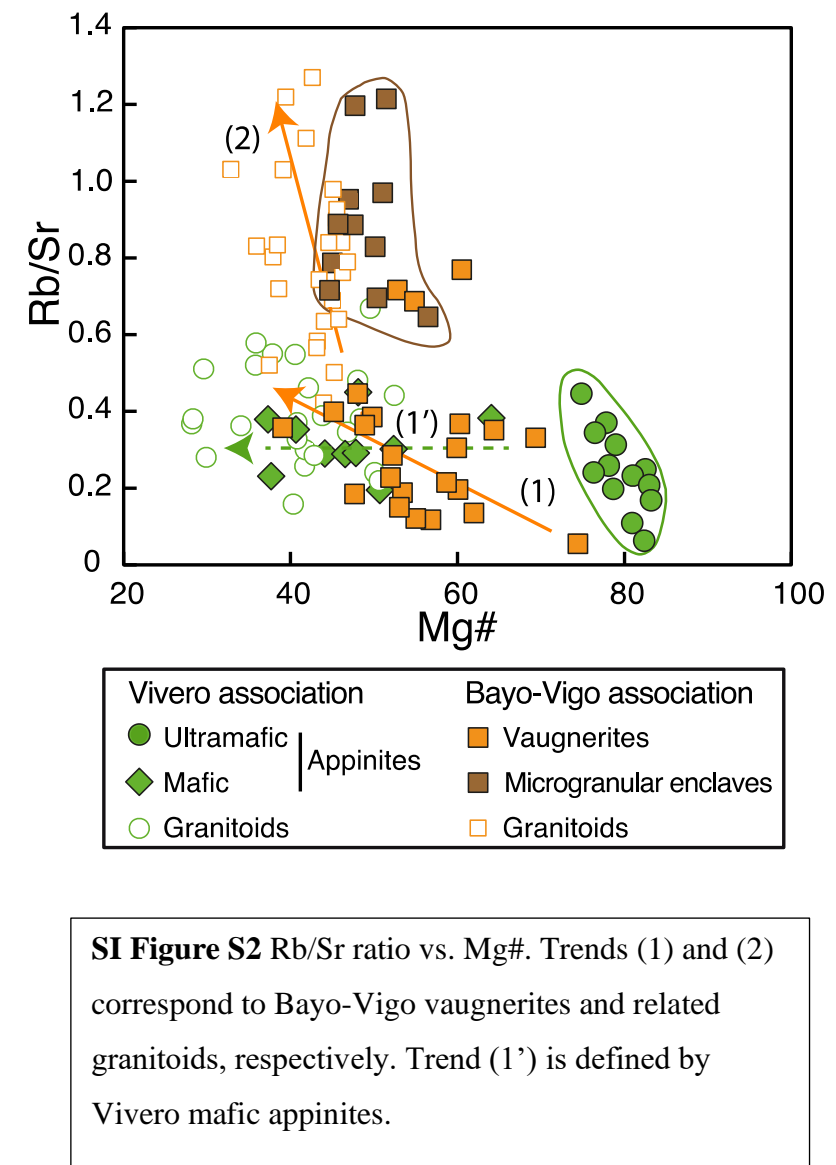

Supplement: Supplementary file 1 [file ejm-35-845-2023-supplement.pdf]
